# Supplementary material
Source: PubMed Central journal article supplement (PMC3952067)
Supplement: NIHMS155833-supplement-Supplementary_data.pdf [file NIHMS155833-supplement-Supplementary_data.pdf]

[Main Page](#)
[Search](#)
[Input](#)
[FAQ](#)
[Links](#)
[Supplemental Info](#)

## Phenowiki: An Online Collaborative Database for Phenotype Annotation

This page provides supplemental material on our review of the latent construct "cognitive control" using the Phenowiki submitted to Molecular Psychiatry

Contents:

- 1) Full Reference List
- 2) List of Cognition Terms
- 3) Full Task List

1) Below lists references for each concept by pubmed ID that were used in our Molecular Psychiatry review:

Cognitive Control References:

[9296549](#) [9854264](#) [10581218](#) [10755295](#) [11526467](#) [11532888](#) [12391312](#) [12371523](#) [12902389](#) [12944513](#) [14532371](#) [15247483](#) [15465977](#) [15539374](#) [15590917](#) [15758164](#) [15883365](#) [15930501](#) [15965199](#) [15994228](#) [16033888](#) [16199848](#) [16407554](#) [16452666](#) [16569698](#) [16580701](#) [16632612](#) [16641225](#) [16672649](#) [16988051](#)

Working Memory References:

[9055794](#) [9577385](#) [9618544](#) [9801381](#) [10219779](#) [10510264](#) [10784471](#) [11053229](#) [11431225](#) [11481163](#) [11590110](#) [11825136](#) [12153834](#) [12405615](#) [12531972](#) [12622656](#) [14594759](#) [15054067](#) [15148138](#) [15337663](#) [15603714](#) [15930072](#) [16304084](#) [16306314](#) [16322379](#) [16330601](#) [16504127](#) [16611807](#) [16738055](#)

Response Inhibition References:

[9002390](#) [9501743](#) [10393989](#) [10884009](#) [10873917](#) [11483475](#) [11496155](#) [11532888](#) [12359667](#) [12456882](#) [12566291](#) [12876143](#) [14594746](#) [14993603](#) [15090477](#) [15182372](#) [15337656](#) [15465979](#) [15770237](#) [15930054](#) [15930055](#) [15950304](#) [16135618](#) [16262993](#) [16399686](#) [16510720](#) [16631144](#) [16797612](#)

Response Selection References:

[9217687](#) [9597666](#) [9554094](#) [10094249](#) [10402259](#) [10729350](#) [10825355](#) [10946878](#) [11113037](#) [11532888](#) [11751032](#) [11784775](#) [12183353](#) [12684780](#) [12880894](#) [14534269](#) [14710965](#) [14607784](#) [14645146](#) [14762131](#) [15102910](#) [15744008](#) [15752421](#) [15819988](#) [15653291](#) [16087350](#) [16177269](#) [16494687](#) [16503376](#)

Task Switching/Set Shifting References:

[9408106](#) [9619187](#) [10192826](#) [10355680](#) [11040879](#) [11069306](#) [11401885](#) [11701603](#) [11872618](#) [11960893](#) [12032364](#) [12091189](#) [12631562](#) [12848334](#) [12944506](#) [14762135](#) [15085092](#) [15337663](#) [15548490](#) [15654026](#) [16144433](#) [16199852](#) [16330590](#) [16452666](#) [16466573](#) [16568724](#) [16632612](#) [16723019](#) [16787105](#)

2) List of Cognition Terms

These 83 terms were used to determine which concepts were most closely related to cognitive control using pubgraph:

abstract thinking, action initiation, action perception, action selection, action suppression, alertness, analytic behavior, "aversion learning OR ""aversive learning""", avoidance, belief, brainstorming, choice, chunking, cognitive control, comprehension, compulsion, conceptual thinking, conditioning, confabulation, consciousness, counting, "creative thinking OR ""creativity""", critical thinking, curiosity, deception, decision making, declarative learning, declarative memory, deductive reasoning, delayed recall, dichotic listening, discourse knowledge, "divide attention OR ""dividedattention""", emotional intelligence, emotional memory, empathetic, encoding of memory, escape avoidance, executive function, feedback learning, fluency, game playing, "goal formation OR ""goal setting""", goalseeking, goaltracking, humor, imagery, imitation, inference, inhibition, instinct, intelligence, intention, judgement, language, latent inhibition, learning, logic, memory, (metacognition OR metacognition), motivation, perception, planning, prediction, priming, problem solving, reading, reasoning, recall, recognition, response selection, response inhibition, retrieval, reversal learning, set-shifting, selective attention, sustained attention, task-switching, teaching, thinking, uncertainty, vocabulary, working memory.

3) Full List of Cognitive Tasks

Below we note behavioral paradigms used to operationally define each concept. Note, molecular and neural definitions (e.g. ERP waveforms) were not included:

### Working Memory Tasks

Top5:

1. N-back Task
2. Digit-Span Task
3. Sternberg Task
4. Delayed Match to Sample
5. Spatial WM (box and token)

others:

-delayed serial recall  
 -CPT19  
 -WCST  
 Letter Number Sequencing

Letter Number Sequencing  
"Alpha Span test"  
-PASAT  
-"Four-term Order" test

### **Response Inhibition Tasks**

Top4:

1. Stop-Signal task
2. Go/NoGo task
3. Stroop task
4. Anti-saccade task

others:

-arrow priming task  
-finger-tapping inhibition  
-two rule serial letter task  
tactile inhibition of return  
-flanker task

### **Response Selection Tasks**

Top3:

1. Choice Reaction Time Tasks
2. Response Mapping Task
3. "The Simon task"

others:

-Reading Regular/Irregular words  
-cued directed attention  
-time estimation  
-backward masking  
-word stem completion  
-Sternberg task

### **Set Shifting/Task Switching Tasks**

Top4:

1. ID/ED task
2. Wisconsin Card Sorting Task
3. TRAILS task
4. Two stimulus switching task

others:

-Go/NoGo task  
-Mouse movement task  
-CVLT

Copyright 2014 Phenowiki all rights reserved.
